# Supplementary material
Source: MDPI journal article supplement (https://www.mdpi.com/2071-1050/16/8/3477)
Supplement: s1 [file s1]

## Supplementary Materials

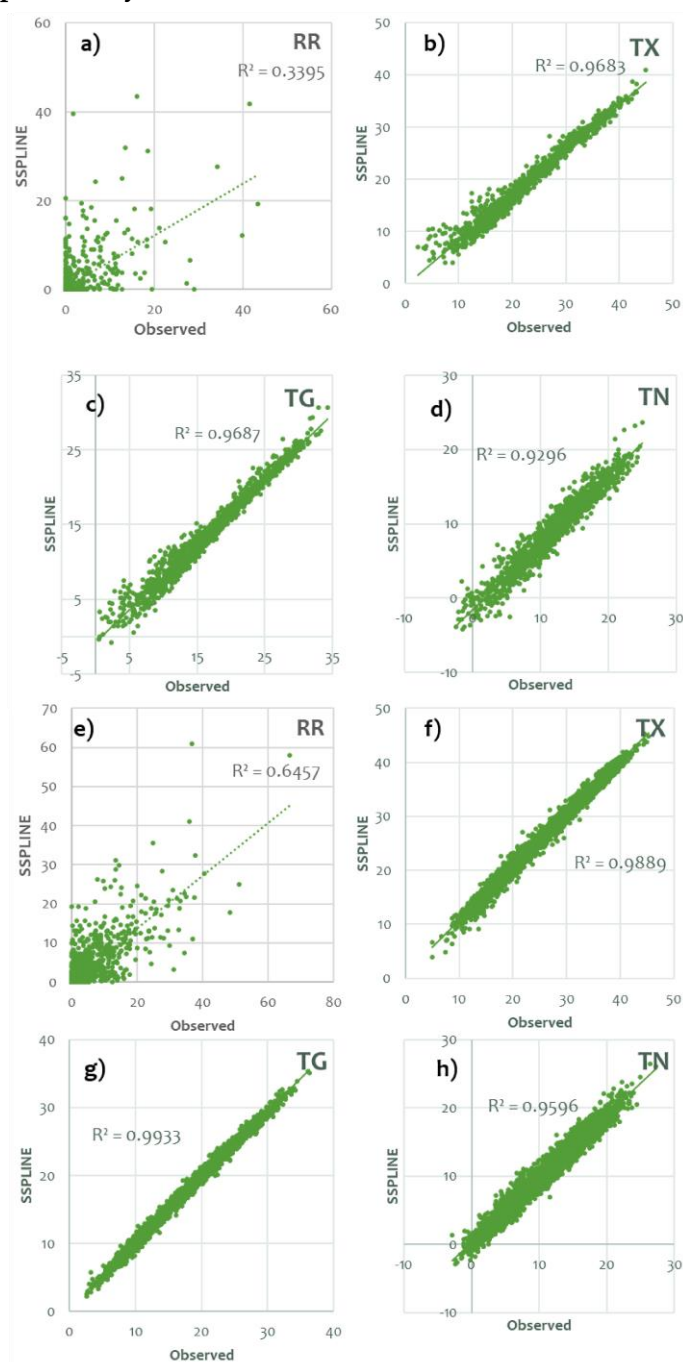

**Figure S1.** Scatterplots of precipitation (RR, in mm), maximum temperature (TX, in °C), mean temperature (TG, in °C) and minimum temperature (TN, in °C), of observed data and smoothing splines derived from quantile mapping for Quinta do Bomfim (QB) (a, b, c, d) and Herdade do Esporão (HE) plots (e, f, g, h), respectively.

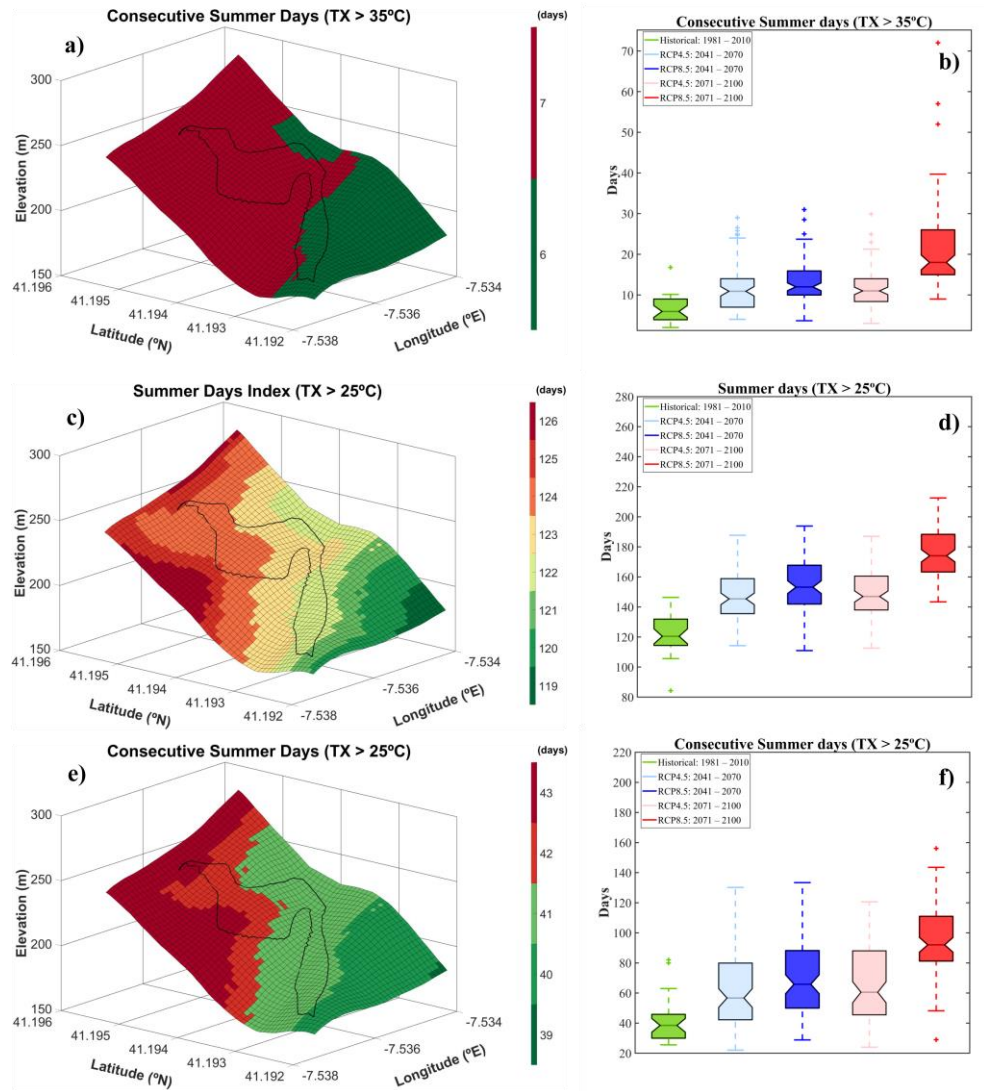

**Figure S2.** Spatial variation for the historical (a, c, e) and boxplots for the historical and future periods (b, d, f) of Consecutive Summer Days (TX > 35 °C) (a, b), Summer Days Index (c, d), and Consecutive Summer Days (TX > 25 °C) (e, f) in Quinta do Bomfim (QB) vineyard plot.

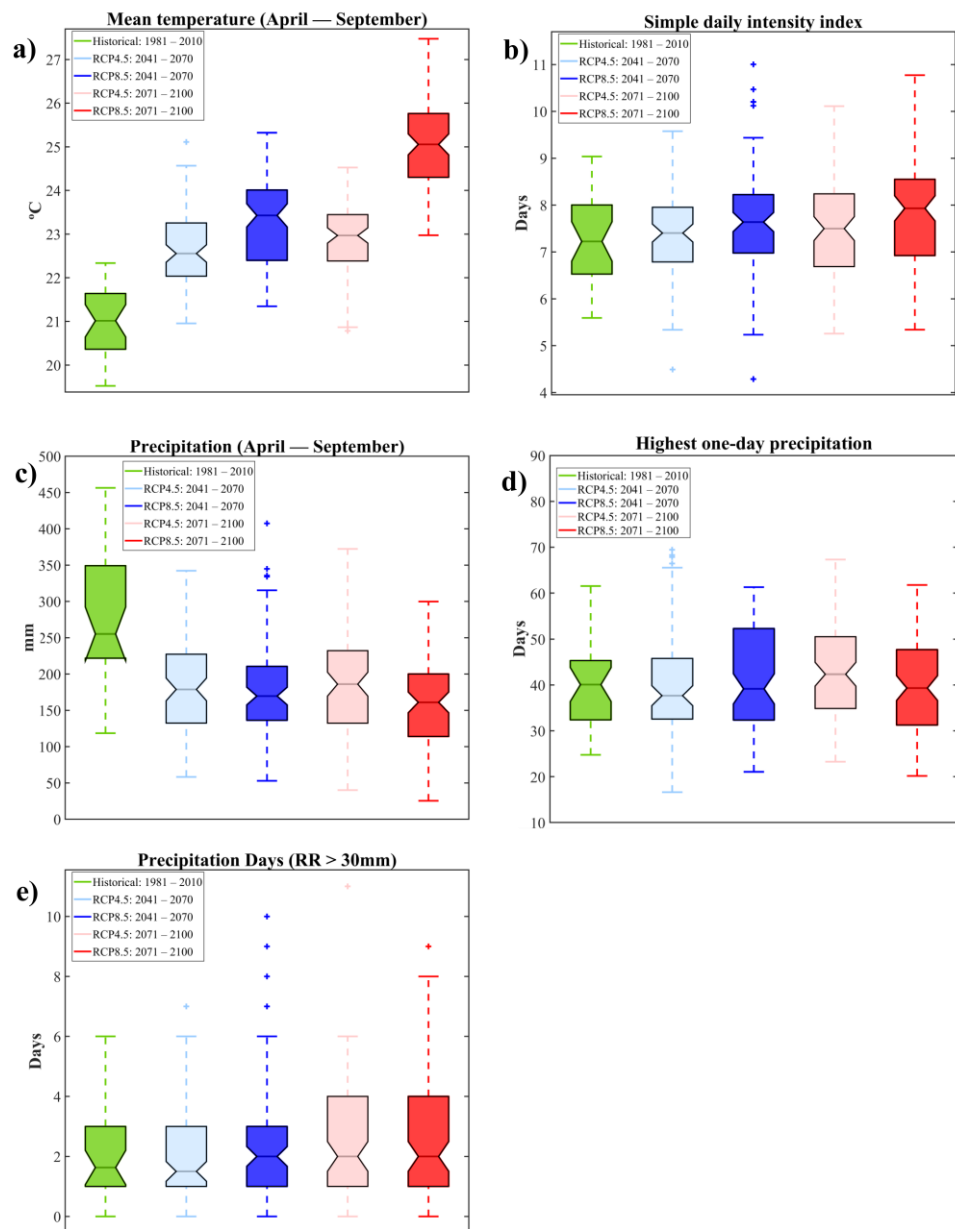

**Figure S3.** Boxplots for the historical and future periods under RCP4.5 and RCP8.5 of (a) Mean temperature (April—September), (b) Simple daily intensity index, (c) Precipitation (April—September), (d) Highest one-day precipitation and (e) Precipitation days above 30 mm in Quinta do Bomfim (QB) vineyard plot.

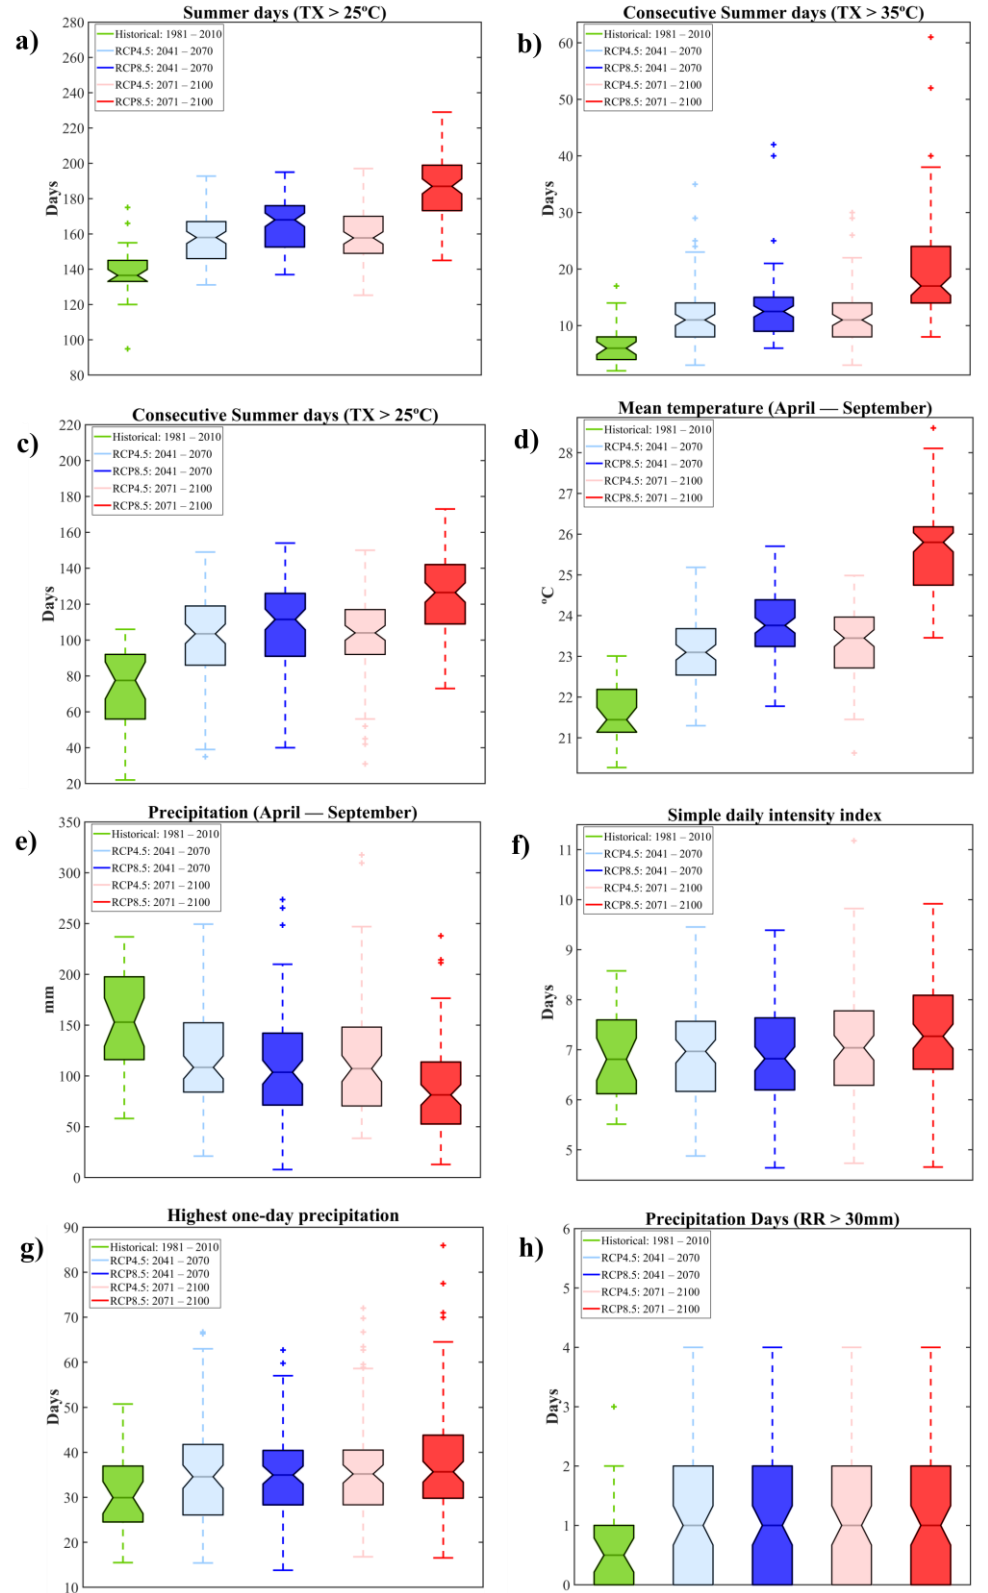

**Figure S4.** Boxplots for the historical and future periods under RCP4.5 and RCP8.5 of (a) Summer days ( $TX > 35^{\circ}C$ ), (b) Consecutive Summer days ( $TX > 35^{\circ}C$ ), (c) Consecutive Summer days ( $TX > 25^{\circ}C$ ), (d) Mean temperature (April–September), (e) Precipitation (April–September), (f) Simple daily intensity index, (g) Highest one-day precipitation and (h) Precipitation Days above 30 mm of Herdade do Esporão (HE) vineyard plot.

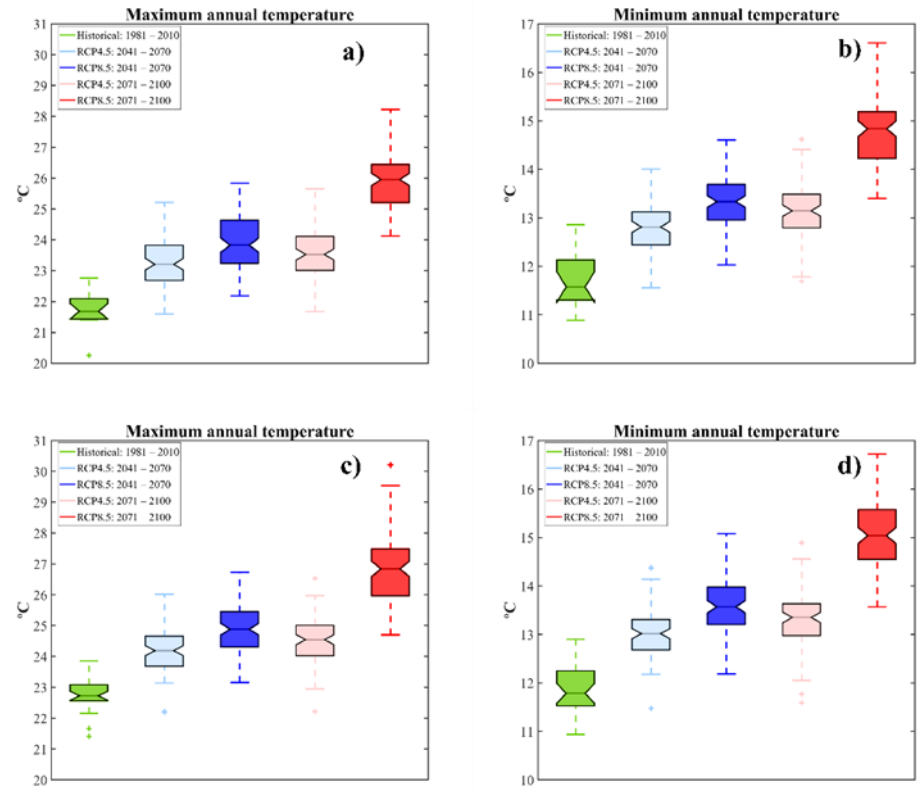

**Figure S5.** Boxplots of maximum annual temperature (a, c) and minimum annual precipitation (b, d) for the historical and future periods for (a, b) Quinta do Bomfim (QB) and (c, d) Herdade do Esporão (HE) vineyard plots.

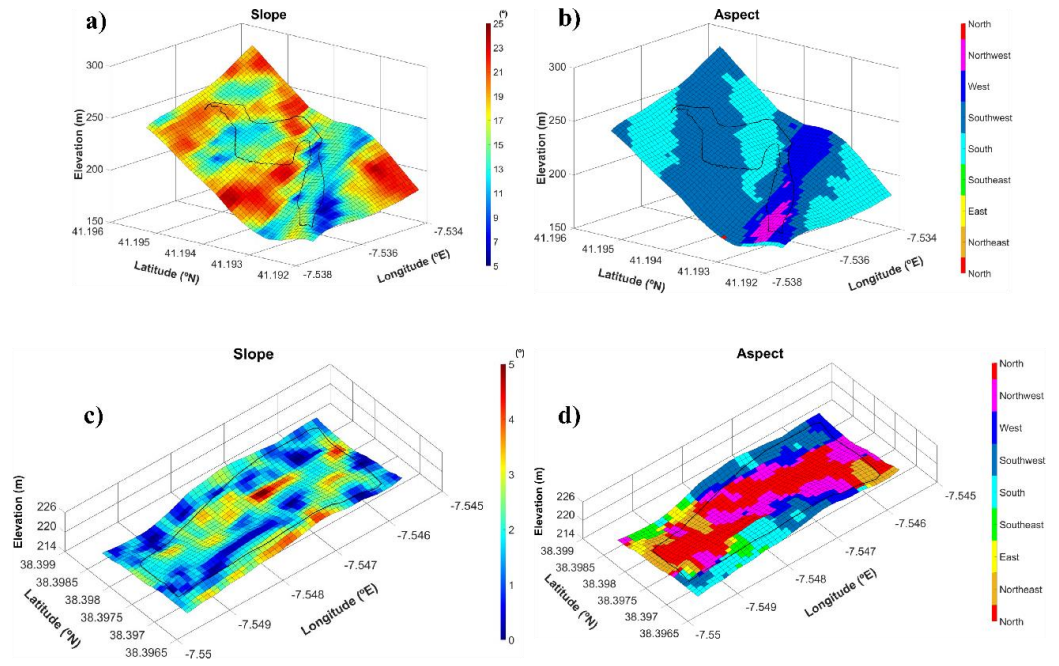

**Figure S6.** Spatialized slope (**a, c**) and aspect (**b, d**) of Quinta Bomfim (QB) (**a, b**) and Herdade do Esporão (HE) (**c, d**) vineyard plots, respectively.

---

**Table S1.** Description of global climate models and regional climate models used in this study.

| <b>Regional</b>       | <b>Institution</b>                                                                        |
|-----------------------|-------------------------------------------------------------------------------------------|
| DMI-HIRHAM5           | Danish Climate Centre at the Danish Meteorological Institute                              |
| SMHIRCA4              | Swedish Meteorological and Hydrological Institute                                         |
| CLMcom-CCLM4-8-17     | Climate Limited-area Modelling Community                                                  |
| <b>Global</b>         | <b>Institution</b>                                                                        |
| ICHEC-EC-EARTH        | Irish Centre for High-End Computing<br>Centre National de Recherches Meteorologiques;     |
| CNRM-CERFACS-CNRM-CM5 | Centre Europeen de Recherche et Formation<br>Avancees en Calcul Scientifique              |
| MPI-M-MPI-ESM-LR      | Max Planck Institute Earth System Model; Coupled<br>Model Intercomparison Project Phase 5 |

**Table S2.** List of the bioclimatic indices computed for this study, their corresponding mathematical definitions, units and classes.

| Bioclimatic Index                                        | Mathematical definition                                                                                                                                                                                                                                                                                                                                                                                                        | Units | Classes                                                                                                                                                                                                                         |
|----------------------------------------------------------|--------------------------------------------------------------------------------------------------------------------------------------------------------------------------------------------------------------------------------------------------------------------------------------------------------------------------------------------------------------------------------------------------------------------------------|-------|---------------------------------------------------------------------------------------------------------------------------------------------------------------------------------------------------------------------------------|
| Dryness Index (DI)                                       | $\sum_{April}^{September} (W_0 + P - T_v - E_s)$ <p> <math>W_0</math> - Initial soil water reserve (mm) on the first month /<br/> DI on the following months;<br/> <math>P</math> - Precipitation (mm);<br/> <math>T_v</math> - Potential vineyard transpiration (mm);<br/> <math>E_s</math> - Direct evaporation from the soil (mm);<br/> <math>T_v</math>; <math>E_s</math> are assessed using the Thornthwaite method. </p> | mm    | Excessively dry: < -100<br>Moderately dry: [-100, 50[<br>Sub-Humid: [50, 150[<br>Humid: ≥ 150                                                                                                                                   |
| Huglin Index (HI)                                        | $\sum_{April}^{September} \frac{(T - 10) + (T_{max} - 10)}{2} d$ <p> <math>T</math> - Mean air temperature (°C);<br/> <math>T_{max}</math> - Maximum air temperature (°C);<br/> <math>d</math> - Length of day coefficient, from 1.02 to 1.06 </p>                                                                                                                                                                             | °C    | Unsuitably Cool: < 900<br>Too Cool: [900, 1200[<br>Very Cool: [1200, 1500[<br>Cool: [1500, 1800[<br>Temperate: [1800, 2100[<br>Warm/Temperate: [2100, 2400[<br>Warm: [2400, 2700[<br>Very Warm: [2700, 3000[<br>Too Hot: ≥ 3000 |
| Hydrothermic index of<br>Branas, Bernon and<br>Levandoux | $\sum_{April}^{August} (T \times P)$ <p> <math>T</math> - Mean air temperature (°C);<br/> <math>P</math> - Precipitation (mm) </p>                                                                                                                                                                                                                                                                                             | °C×mm | Low risk of<br>contamination: < 2500<br>Medium risk of<br>contamination: [2500,<br>5100[<br>High risk of<br>contamination: [5100,<br>7500[<br>Very high risk of<br>contamination: > 7500                                        |
| Growing season<br>accumulated precipitation              | $\sum_{April}^{September} (P)$ <p><math>P</math> - Precipitation (mm)</p>                                                                                                                                                                                                                                                                                                                                                      | mm    | —                                                                                                                                                                                                                               |
| Growing season mean<br>temperature                       | $\sum_{April}^{October} (T)$ <p><math>T</math> - Mean air temperature (°C)</p>                                                                                                                                                                                                                                                                                                                                                 | °C    | Too cool: < 12<br>Cool: [12, 15[<br>Intermediate: [15, 17[<br>Warm: [17, 19[<br>Hot: [19, 21[<br>Very Hot: [21, 22[                                                                                                             |

**Table S3.** List of the climatic indices computed for this study and their definition.

| <b>Index</b>                    | <b>Definition</b>                                                                                   |
|---------------------------------|-----------------------------------------------------------------------------------------------------|
| Summer days (TX > 25 °C)        | Days in a year with maximum temperature above 25 °C                                                 |
| Consecutive summer days         | Number of consecutive days where maximum temperature is above a threshold (25 °C or 35 °C)          |
| Mean temperature (Apr-Sep)      | Mean temperature in a year from April through September                                             |
| Precipitation (Apr - Sep)       | Total precipitation in a year from April through September                                          |
| Simple daily intensity index    | Mean precipitation amount on wet days (above 1 mm)                                                  |
| Precipitation days (RR > 30 mm) | Days with precipitation above 30 mm in a daily time series for a determined period (usually a year) |
| Highest one-day precipitation   | Maximum daily precipitation amount of a time series (usually a year)                                |

**Table S4.** ANOVA results for all temperature variables (maximum, mean and minimum) for both Quinta do Bomfim (QB) and Herdade do Esporão (HE).

|               | <b>Sum<br/>Squares</b> | <b>Degrees of<br/>Freedom</b> | <b>Mean<br/>Square</b> | <b>F-<br/>statistic</b> | <b>p-<br/>value</b> |
|---------------|------------------------|-------------------------------|------------------------|-------------------------|---------------------|
| <b>Groups</b> | 1213360                | 5                             | 242672                 | 5731                    | 0.00                |
| <b>Error</b>  | 2783360                | 65736                         | 42                     |                         |                     |
| <b>Total</b>  | 3996720                | 657541                        |                        |                         |                     |

**Table S5.** Tukey-Kramer test for multiple comparisons.

| <b>Group*</b> | <b>Group</b> | <b>Difference</b> | <b>Lower bounds</b> | <b>Upper bounds</b> | <b>p-Value</b> |
|---------------|--------------|-------------------|---------------------|---------------------|----------------|
| TG-QB         | TG-HE        | -0.99             | -0.74               | -0.49               | 0.00           |
| TG- QB        | TN-QB        | 4.57              | 4.82                | 5.07                | 0.00           |
| TG- QB        | TN-HE        | 4.28              | 4.53                | 4.78                | 0.00           |
| TG- QB        | TX- QB       | -5.47             | -5.22               | -4.97               | 0.00           |
| TG- QB        | TX-HE        | -6.63             | -6.38               | -6.13               | 0.00           |
| TG-HE         | TN- QB       | 5.31              | 5.56                | 5.81                | 0.00           |
| TG-HE         | TN-HE        | 5.02              | 5.27                | 5.52                | 0.00           |
| TG-HE         | TX- QB       | -4.73             | -4.48               | -4.23               | 0.00           |
| TG-HE         | TX-HE        | -5.89             | -5.64               | -5.39               | 0.00           |
| TN- QB        | TN-HE        | -0.54             | -0.29               | -0.04               | 0.01           |
| TN- QB        | TX-QB        | -10.29            | -10.04              | -9.79               | 0.00           |
| TN- QB        | TX-HE        | -11.45            | -11.20              | -10.95              | 0.00           |
| TN-HE         | TX- QB       | -10.00            | -9.75               | -9.50               | 0.00           |
| TN-HE         | TX-HE        | -11.16            | -10.91              | -10.66              | 0.00           |
| TX- QB        | TX-HE        | -1.41             | -1.16               | -0.91               | 0.00           |

\*(TG – mean temperature; TN – minimum temperature; TX – maximum temperature; QB – Quinta do Bomfim; HE – Herdade do Esporão).
